# Supplementary material for: Ultrafine VN quantum nanodots anchored in three-dimensional porous N-doped carbon with excellent pseudocapacitive behaviour for high rate lithium-ion batteries
Source: Royal Society of Chemistry journal article supplement (doi:10.1039/d4nj02950j), 2024-01-01

Supplementary Information (SI) for New Journal of Chemistry.

This journal is © The Royal Society of Chemistry and the Centre National de la Recherche Scientifique 2024

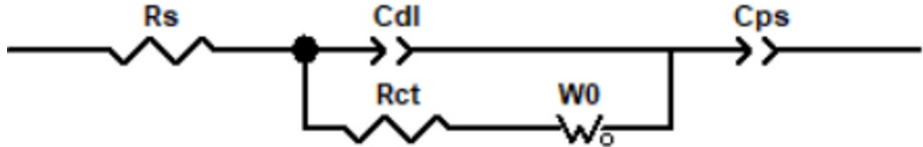

Supplement: d4nj02950j7.pdf [file d4nj02950j7.pdf]
