# Supplementary material for: Ultrafine VN quantum nanodots anchored in three-dimensional porous N-doped carbon with excellent pseudocapacitive behaviour for high rate lithium-ion batteries
Source: Royal Society of Chemistry journal article supplement (doi:10.1039/d4nj02950j), 2024-01-01
Supplement: d4nj02950j9.pdf [file d4nj02950j9.pdf]

**Ultrafine VN quantum nanodots anchored in three-dimensional porous N-doped carbon with excellent pseudocapacitive behaviour for high rate lithium-ion batteries**

Dong Wang,<sup>a</sup> Yanfang Gao,<sup>\* a</sup> Zihan Guo,<sup>\* a</sup> and Zhiwei Wang<sup>a b</sup>

- a. School of Chemical Engineering, Inner Mongolia University of Technology, Hohhot, 010051, P.R. China.  
E-mail: yf\_gao@imut.edu.cn; gzh@imut.edu.cn
- b. School of Business Administration, Inner Mongolia University of Finance and Economics, Hohhot, 010070, P.R. China.

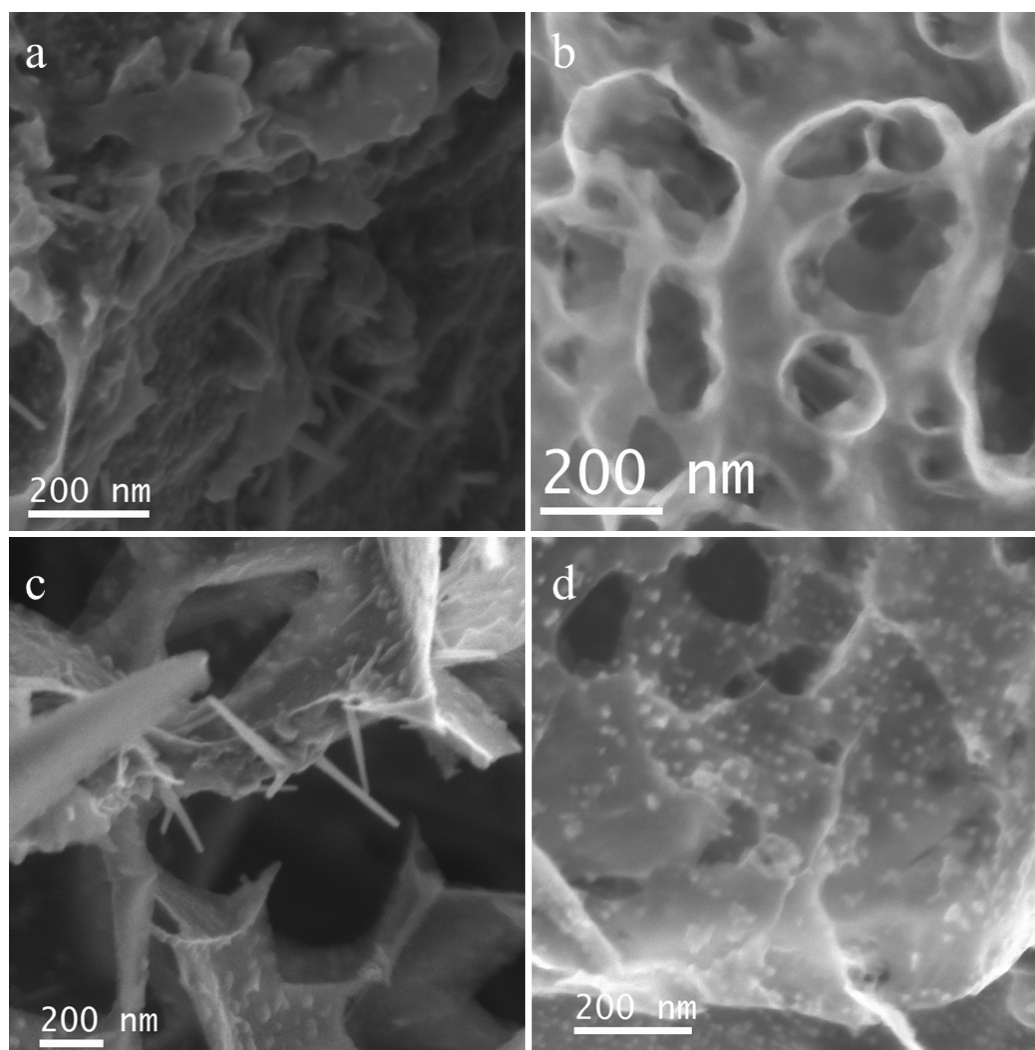

**Figure S1** Magnified SEM images of a) VNQDs@PNC-1, b) VNQDs@PNC-2, c) VNQDs@PNC-3, and d) VNQDs@PNC-4.

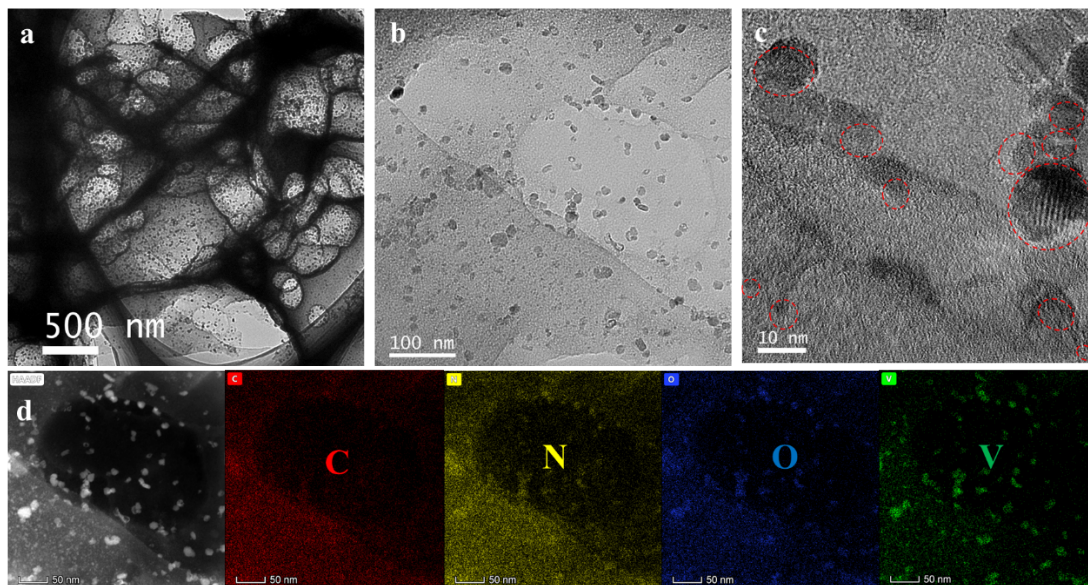

**Figure S2** (a, b) TEM images, (c) HRTEM image, and corresponding (d) EDS of VNQDs@PNC-4.

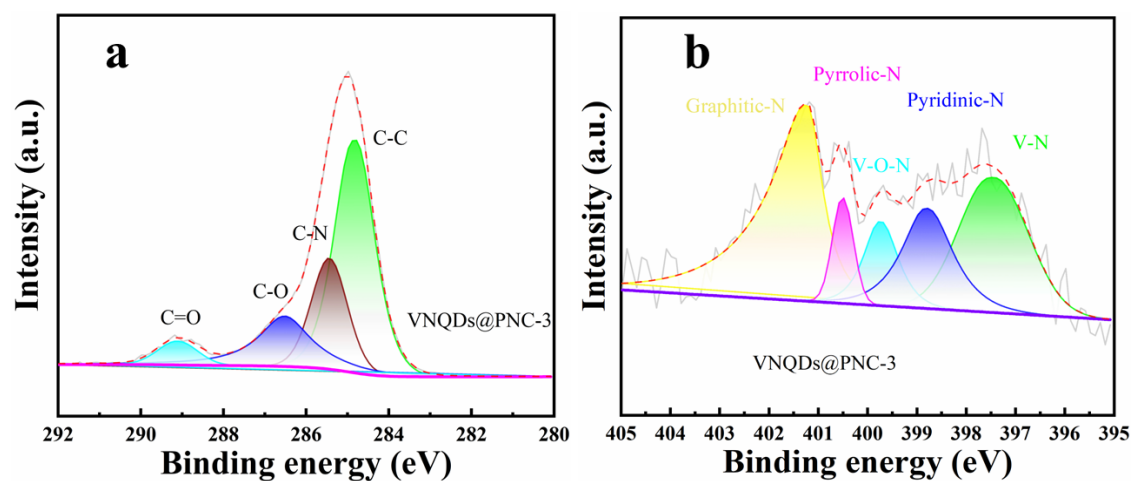

**Figure S3** High resolution spectra (a) C1s and (b) N1s of VNQDs@PNC-3.

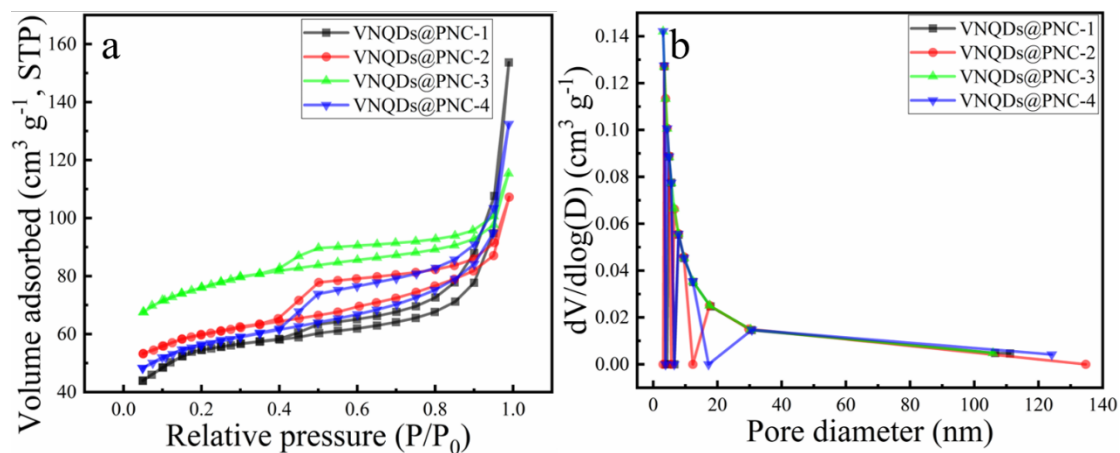

**Figure S4** (a) N<sub>2</sub> adsorption-desorption isotherm and (b) Pore size distribution of VNQDs@PNC-1, VNQDs@PNC-2, VNQDs@PNC-3, and VNQDs@PNC-4.

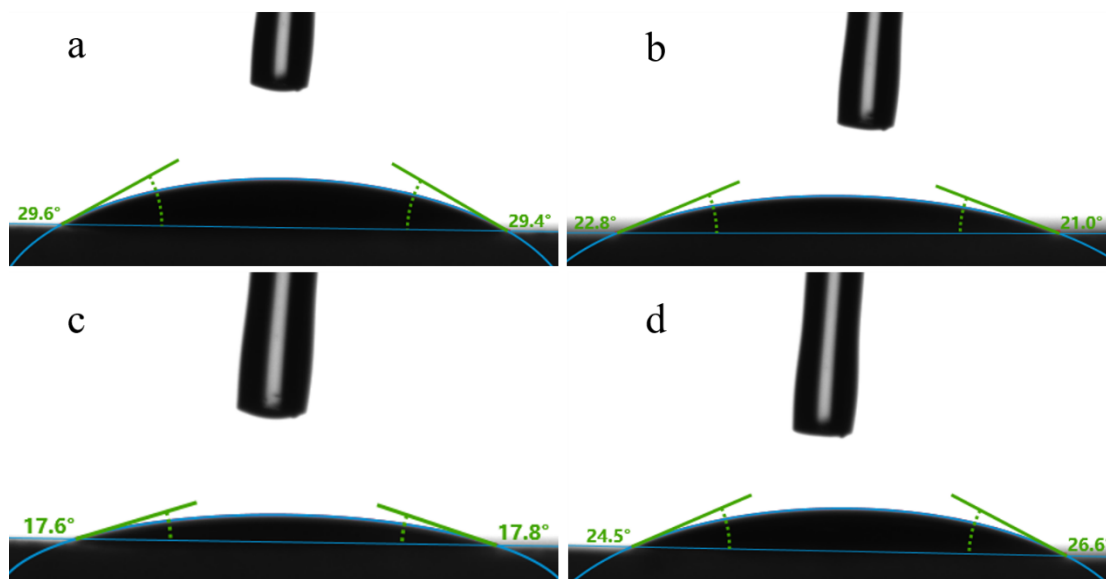

Figure S5 Contact angle of (a) VNQDs@PNC-1, (b) VNQDs@PNC-2, (c) VNQDs@PNC-3, and (d) VNQDs@PNC-4 electrode with an electrolyte droplet for the static state.

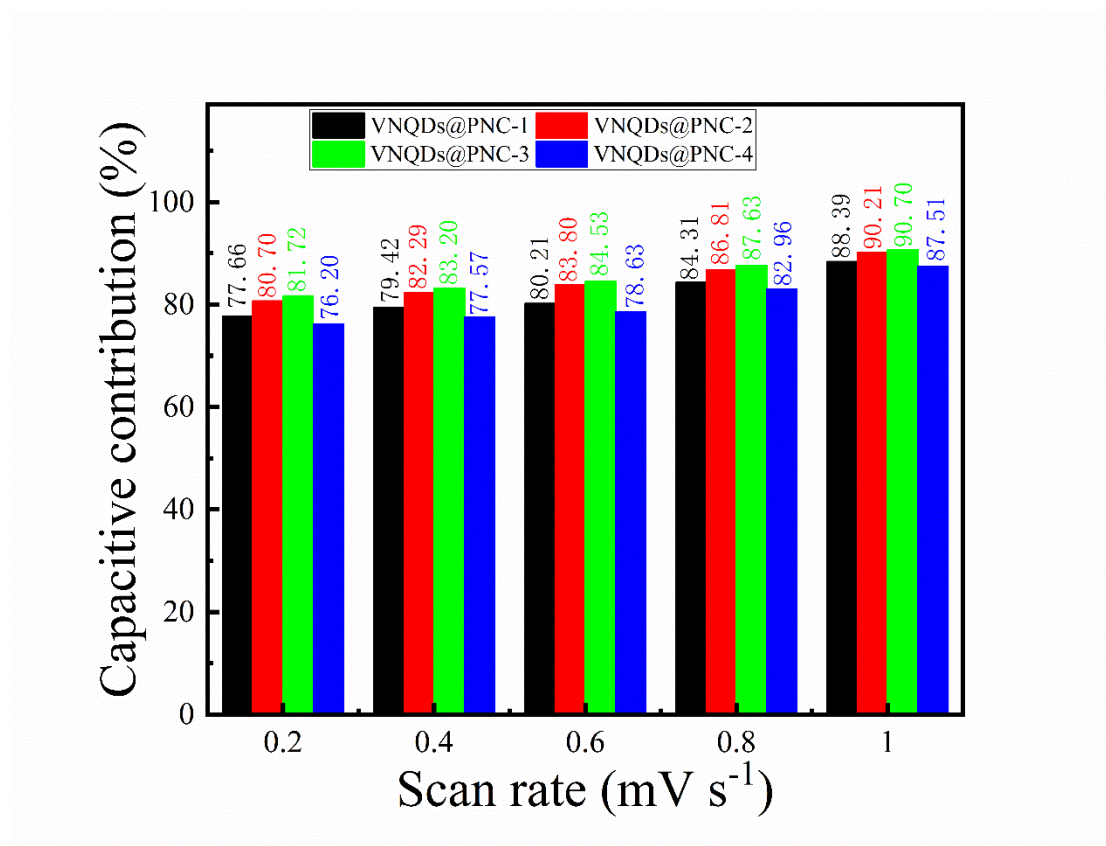

Figure S6 A comparison of the capacitive contribution at different scanning speeds of VNQDs@PNC-1, VNQDs@PNC-2, VNQDs@PNC-3, and VNQDs@PNC-4.

A comparison of capacitive contributions under the different scan rates between DRX-Li<sub>3</sub>V<sub>2</sub>O<sub>5</sub> anodes from V<sub>2</sub>O<sub>5</sub> bulk and nanosheets.



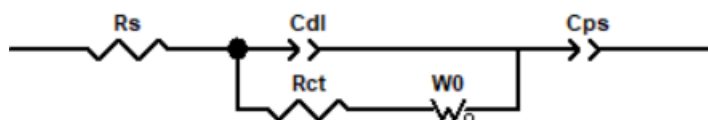

**Figure S7** The fitting equivalent circuit model of EIS

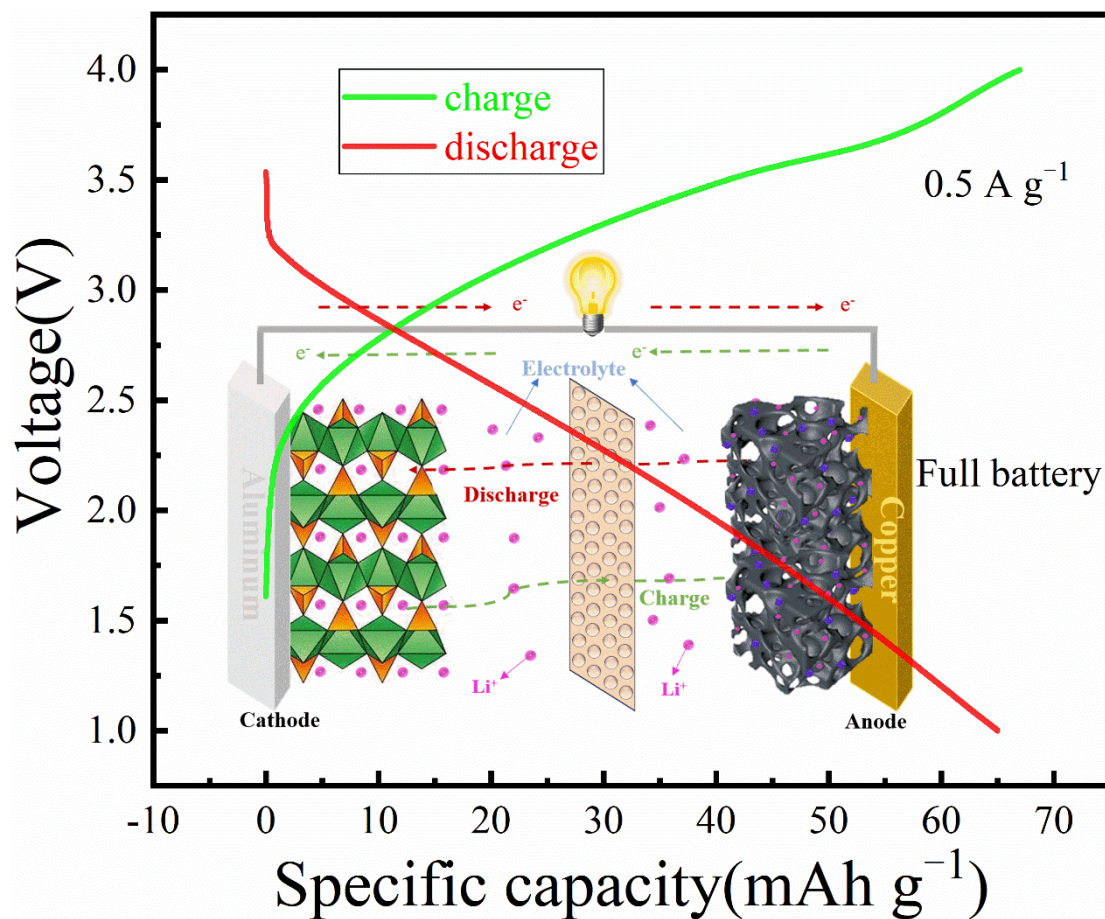

**Figure S8** Charge-discharge profiles of VNQDs@NPC-3||LFP LIBs and Schematic illustration LIBs (inset).

**Table S1** The VNQDs@PNC-X prepared with different ratios of glucose to urea

| Entry       | Starting materials |          |                                     |          |                       |
|-------------|--------------------|----------|-------------------------------------|----------|-----------------------|
|             | Glucose (g)        | Urea (g) | NH <sub>4</sub> VO <sub>3</sub> (g) | NaCl (g) | H <sub>2</sub> O (mL) |
| VNQDs@PNC-1 | 3                  | 1        | 1                                   | 10       | 80                    |
| VNQDs@PNC-2 | 2                  | 1        | 1                                   | 10       | 80                    |
| VNQDs@PNC-3 | 1.5                | 1        | 1                                   | 10       | 80                    |
| VNQDs@PNC-4 | 1                  | 1        | 1                                   | 10       | 80                    |

**Table S2** The ratio of ID to IG for the investigated sheets, where ID and IG are the Raman intensities of the D and G peaks

| Samples     | ID       | IG       | ID : IG |
|-------------|----------|----------|---------|
| VNQDs@PNC-1 | 12077.73 | 11719.22 | 0.97    |
| VNQDs@PNC-2 | 18296.06 | 18561.40 | 1.01    |
| VNQDs@PNC-3 | 12814.03 | 13210.33 | 1.03    |
| VNQDs@PNC-4 | 12909.83 | 13267.8  | 1.02    |

**Table S3** The weight percentage of VN in the TGA data

| Samples     | V <sub>2</sub> O <sub>5</sub> (%) | V (%) | VN (%) |
|-------------|-----------------------------------|-------|--------|
| VNQDs@PNC-1 | 48.47                             | 13.58 | 17.31  |
| VNQDs@PNC-2 | 59.60                             | 16.69 | 21.28  |
| VNQDs@PNC-3 | 60.81                             | 17.03 | 21.72  |
| VNQDs@PNC-4 | 62.75                             | 17.57 | 22.41  |

**Table S4** Resistance elements of four samples derived from the Nyquist plots.

| Samples     | R <sub>s</sub> (Ω) | R <sub>ct</sub> (Ω) | W <sub>o</sub> (Ω) |
|-------------|--------------------|---------------------|--------------------|
| VNQDs@PNC-1 | 2.117              | 280.3               | 154.3              |
| VNQDs@PNC-2 | 1.275              | 228.3               | 138.1              |
| VNQDs@PNC-3 | 1.783              | 137.1               | 140.9              |
| VNQDs@PNC-4 | 1.875              | 179.2               | 167.8              |
