# Supplementary figures and images for: Ultrafine VN quantum nanodots anchored in three-dimensional porous N-doped carbon with excellent pseudocapacitive behaviour for high rate lithium-ion batteries
Source: Royal Society of Chemistry journal article supplement (doi:10.1039/d4nj02950j), 2024-01-01

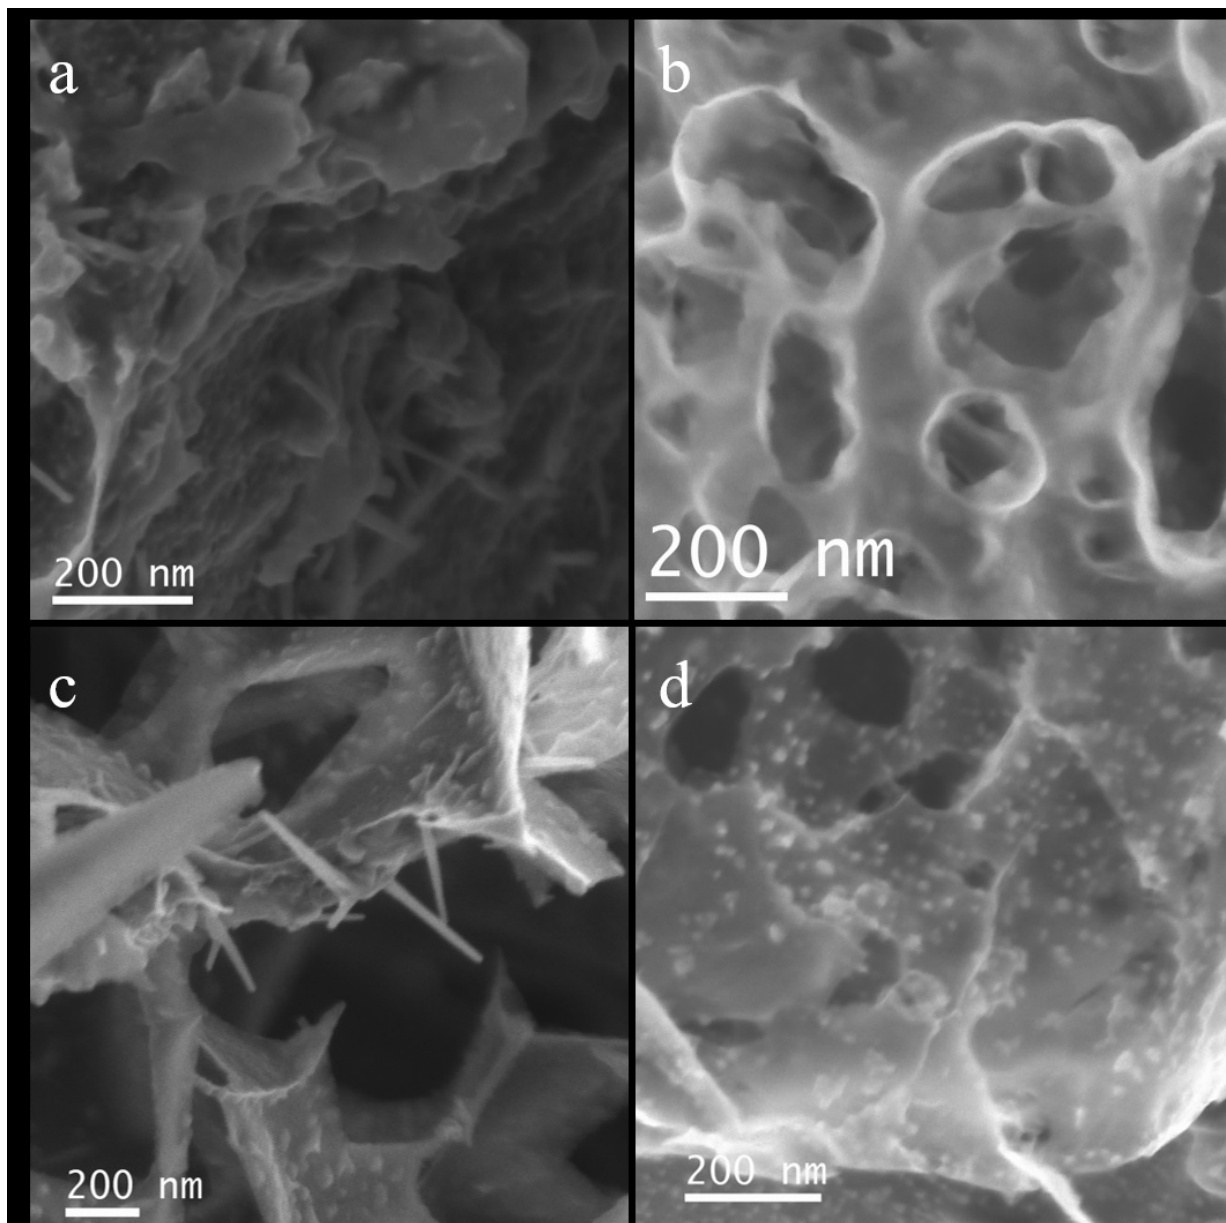

Supplement: d4nj02950j1.pdf [file d4nj02950j1.pdf]

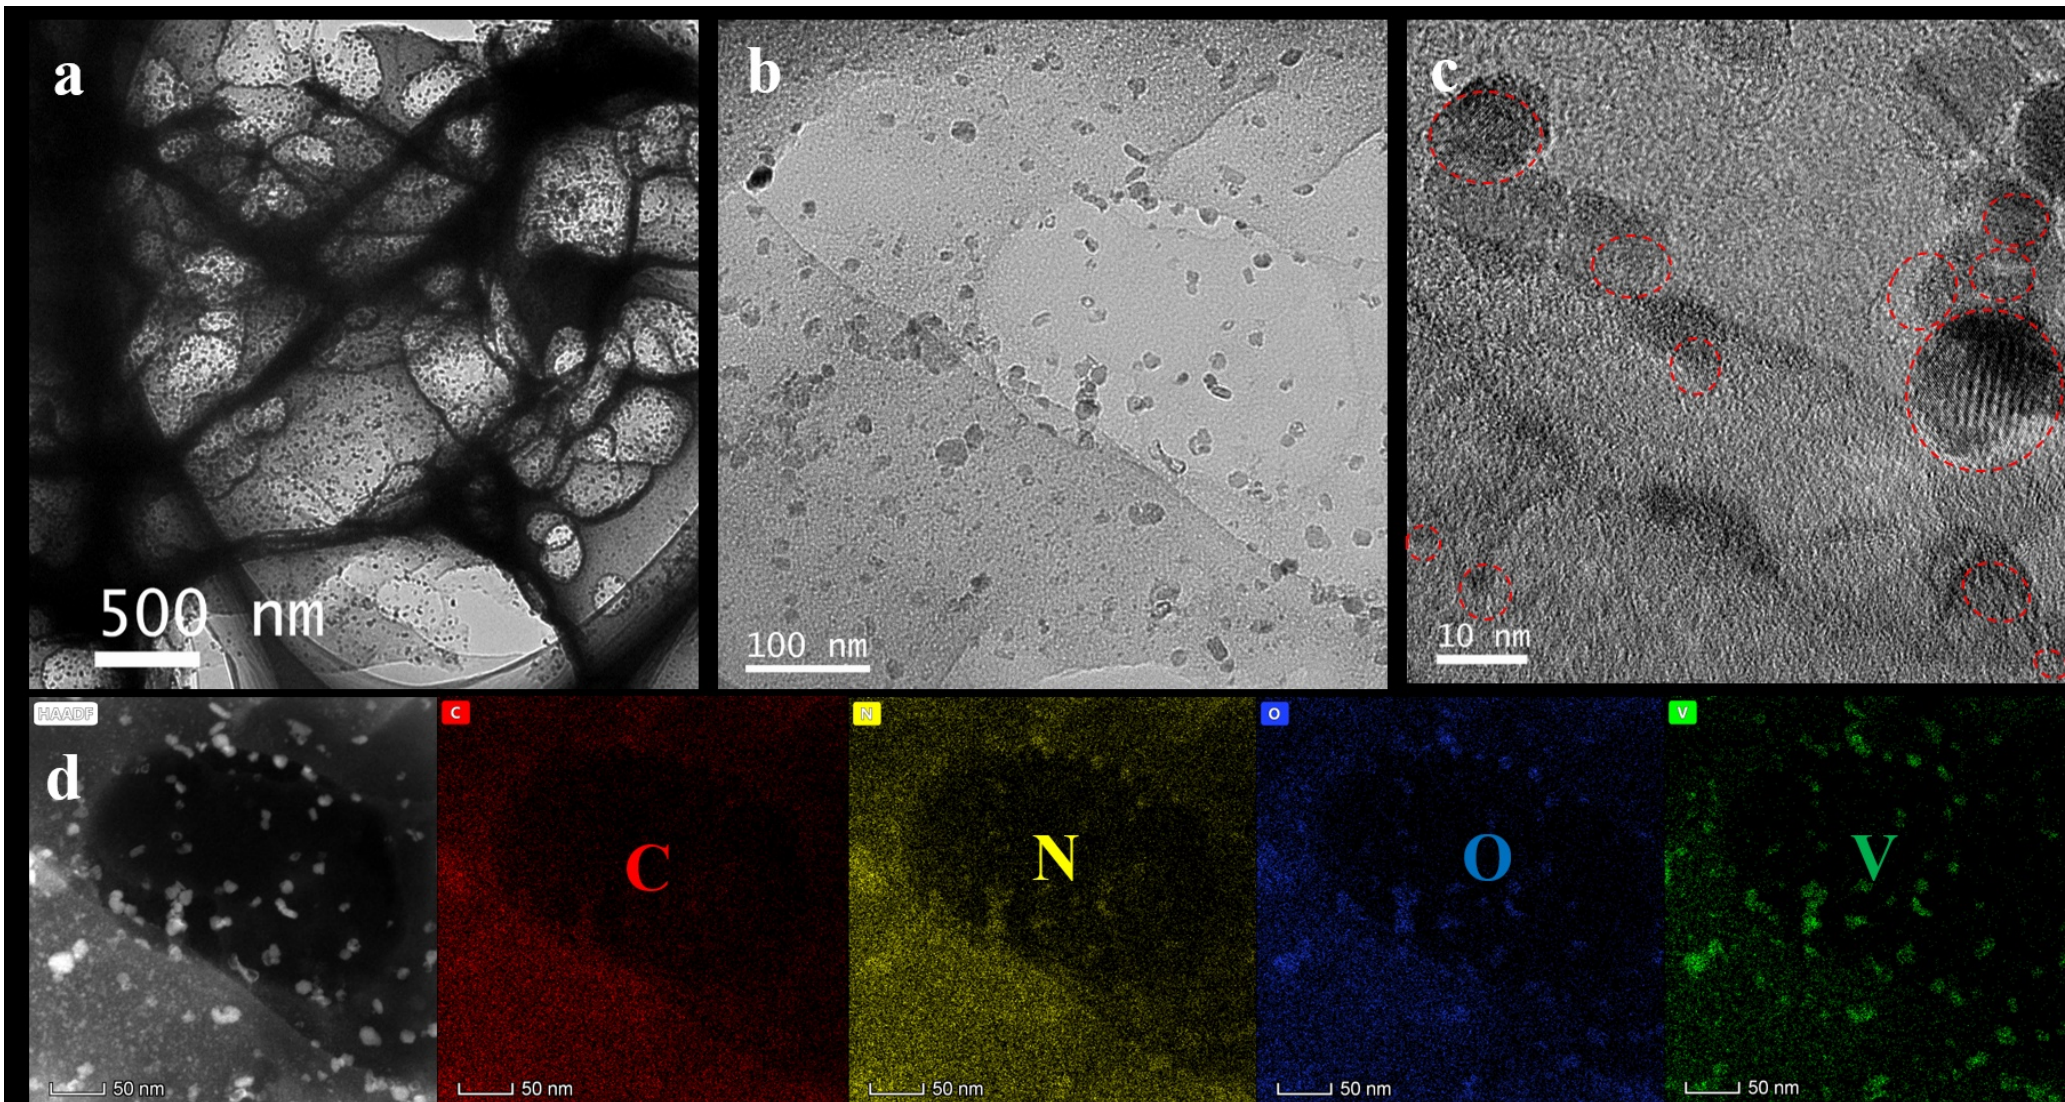

Supplement: d4nj02950j2.pdf [file d4nj02950j2.pdf]

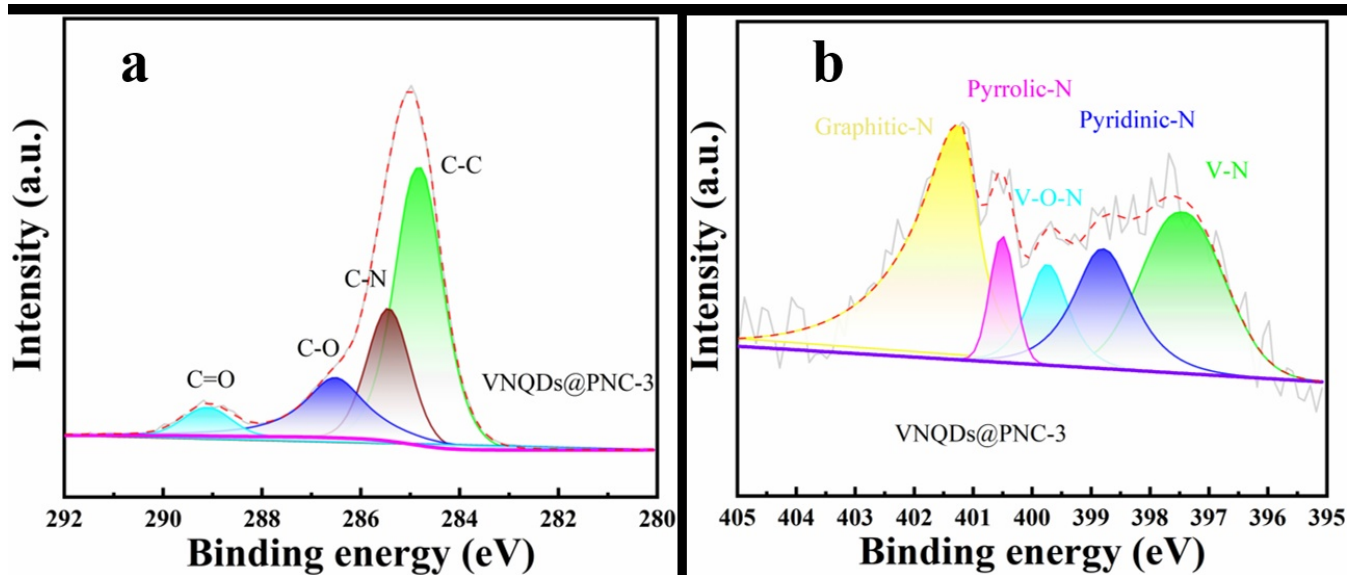

Supplement: d4nj02950j3.pdf [file d4nj02950j3.pdf]

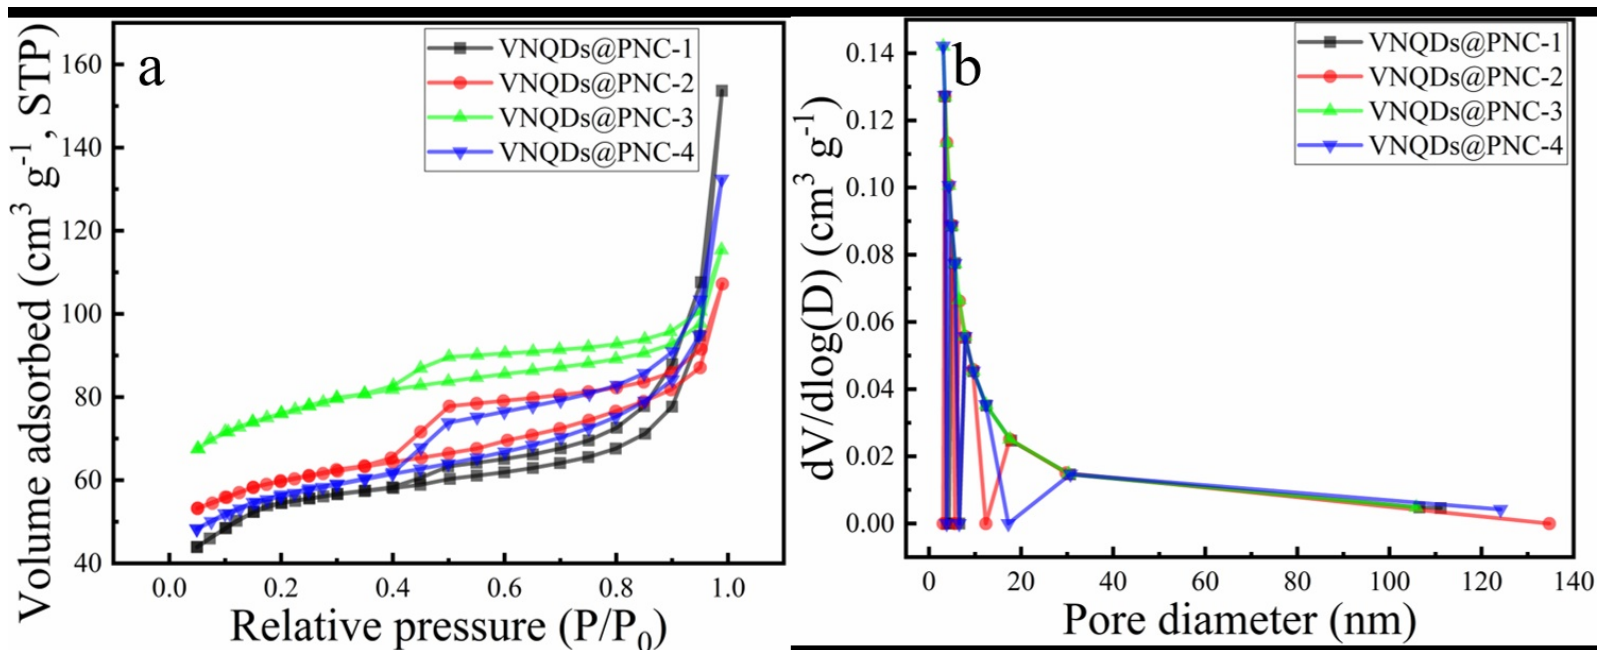

Supplement: d4nj02950j4.pdf [file d4nj02950j4.pdf]

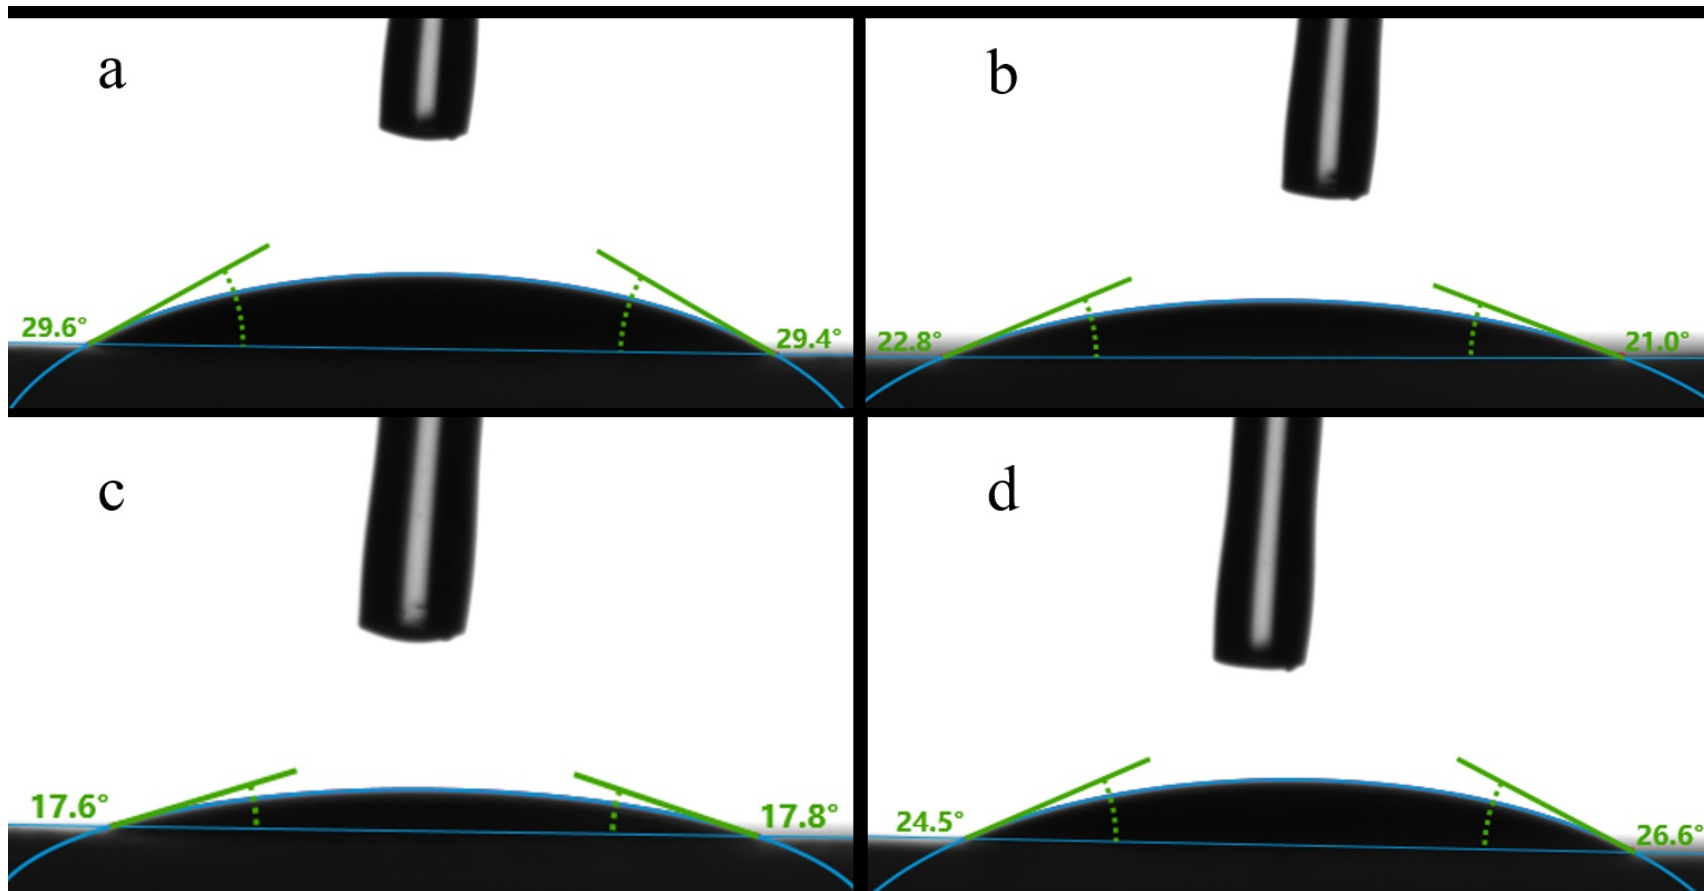

Supplement: d4nj02950j5.pdf [file d4nj02950j5.pdf]

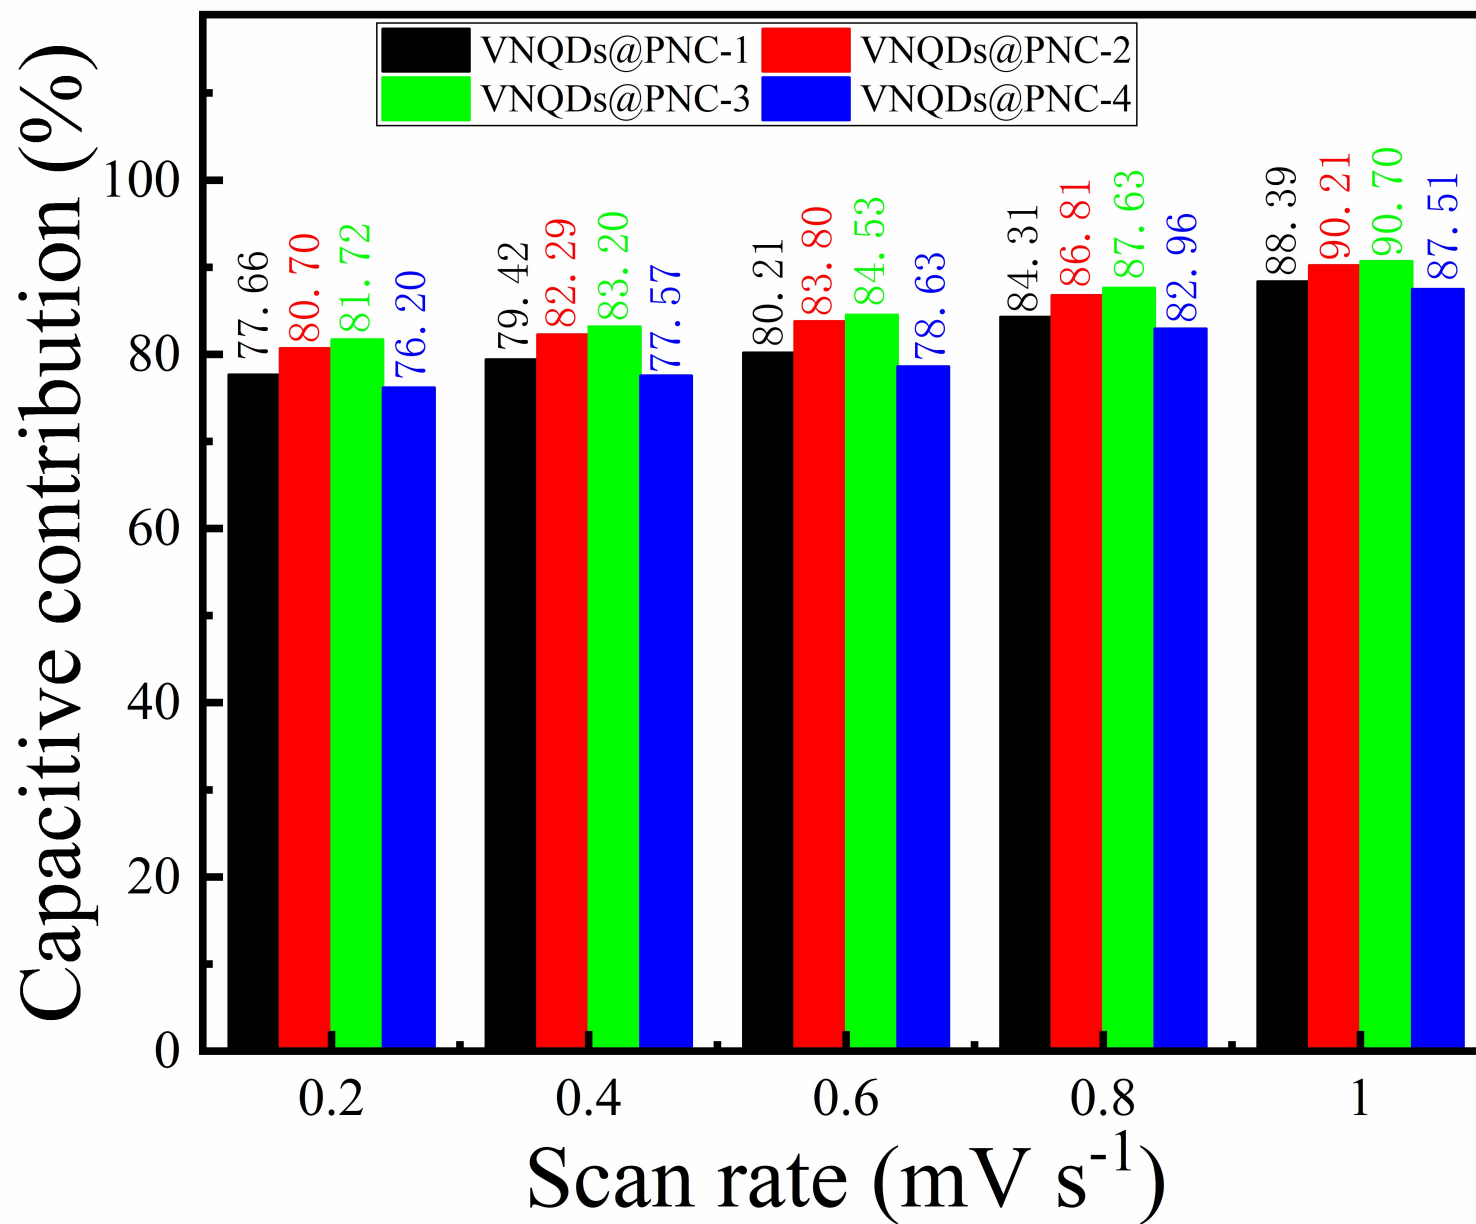

Supplement: d4nj02950j6.pdf [file d4nj02950j6.pdf]

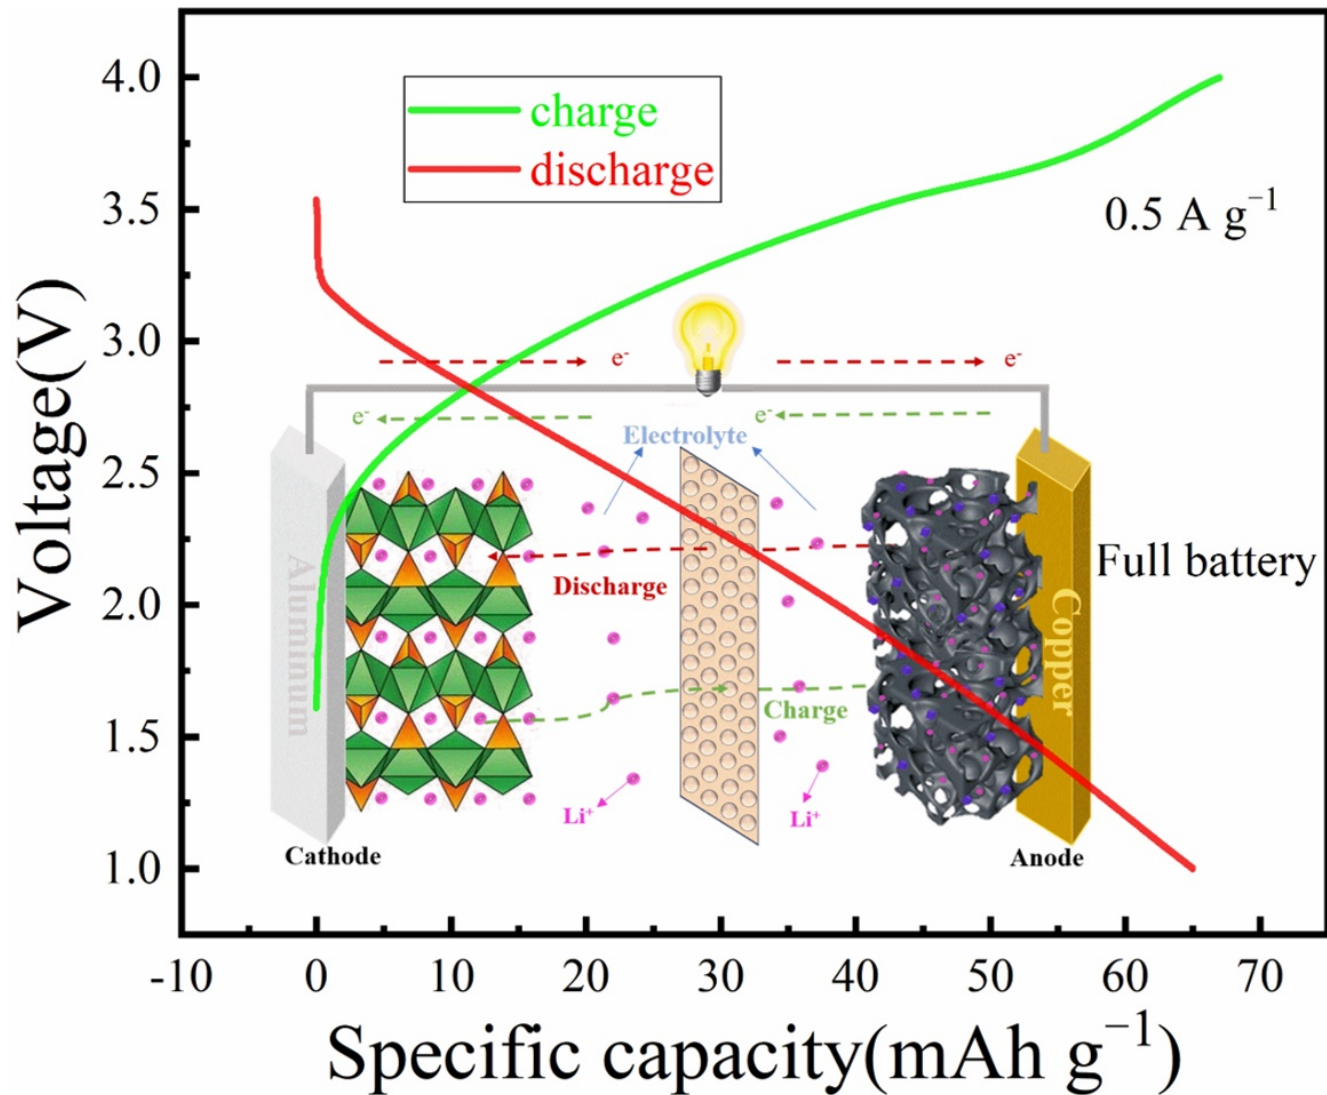

Supplement: d4nj02950j8.pdf [file d4nj02950j8.pdf]
